# Supplementary material
Source: publisher site journal article supplement (https://www.dovepress.com/article/499436)
Supplement: Supplementary file 1 [file get_supplementary_file.php]

**Supplementary Material 1: The CT scanning protocol**

All patients at both centers were scanned using the same scanning protocol: a multi-displacement CT (MDCT) unit (GE Healthcare, USA or Discovery CT 750 HD, GE Healthcare, USA or SOMATOM Definition Flash, Siemens. Germany or Brilliance 16, Philips, Netherlands) for multiphase dynamic contrast-enhanced CT of the abdomen.The parameters were as follows: 120 kV, automatic tube current, rotation time 0.4 or 0.5 or 0.75 s, detector collimation 64 × 0.625 mm or 128 × 0.625 mm or 16 × 0.625 mm, field of view 300 - 500 mm × 300-500 mm, matrix 512 × 512, layer spacing 5 mm, layer thickness 5 mm, and after conventional plain scanning, 1.5 mL/kg of contrast agent was injected intravenously with a delay of 25-30 s and 60-70 s for postoperative pulsatile phase (AP) and portal venous phase (VP) enhancement scans (Ultravist 370, Bayer Schering Pharma, Berlin, Germany) were injected at a rate of 3.0 to 3.5 mL/s with a pump syringe (Ulrich CT Plus 150, Ulrich Medical, Ulm, Germany).

**Supplementary Material 2: Radscore calculation formula**

Radscore = 1.642723664780366×Tumor_auto__exponential_glrlm_RunLengthNonUniformity

+ 1.3049497728073816×Tumor_auto__wavelet-HHH_glszm_SizeZoneNonUniformity

－ 2.03360831609081×liver_auto__lbp-3D-m1_firstorder_Skewness

+ 2.8762149819981055×liver_auto__lbp-3D-m2_firstorder_Mean

+ 1.872523961830031×liver_auto__log-sigma-1-0-mm-3D_glcm_Imc1

－ 2.71738422728992×liver_auto__log-sigma-1-0-mm-3D_gldm_DependenceNonUniformityNormalized

－ 1.49706806645258 × liver_auto__wavelet-HHH_glcm_DifferenceEntropy

－ 1.83937416749891 × liver_auto__wavelet-HHL_firstorder_Mean

－ 1.49175889427814 × liver_auto__wavelet-LHH_firstorder_Mean

+ 1.9292417763391596 × liver_auto__wavelet-LLH_firstorder_Kurtosis


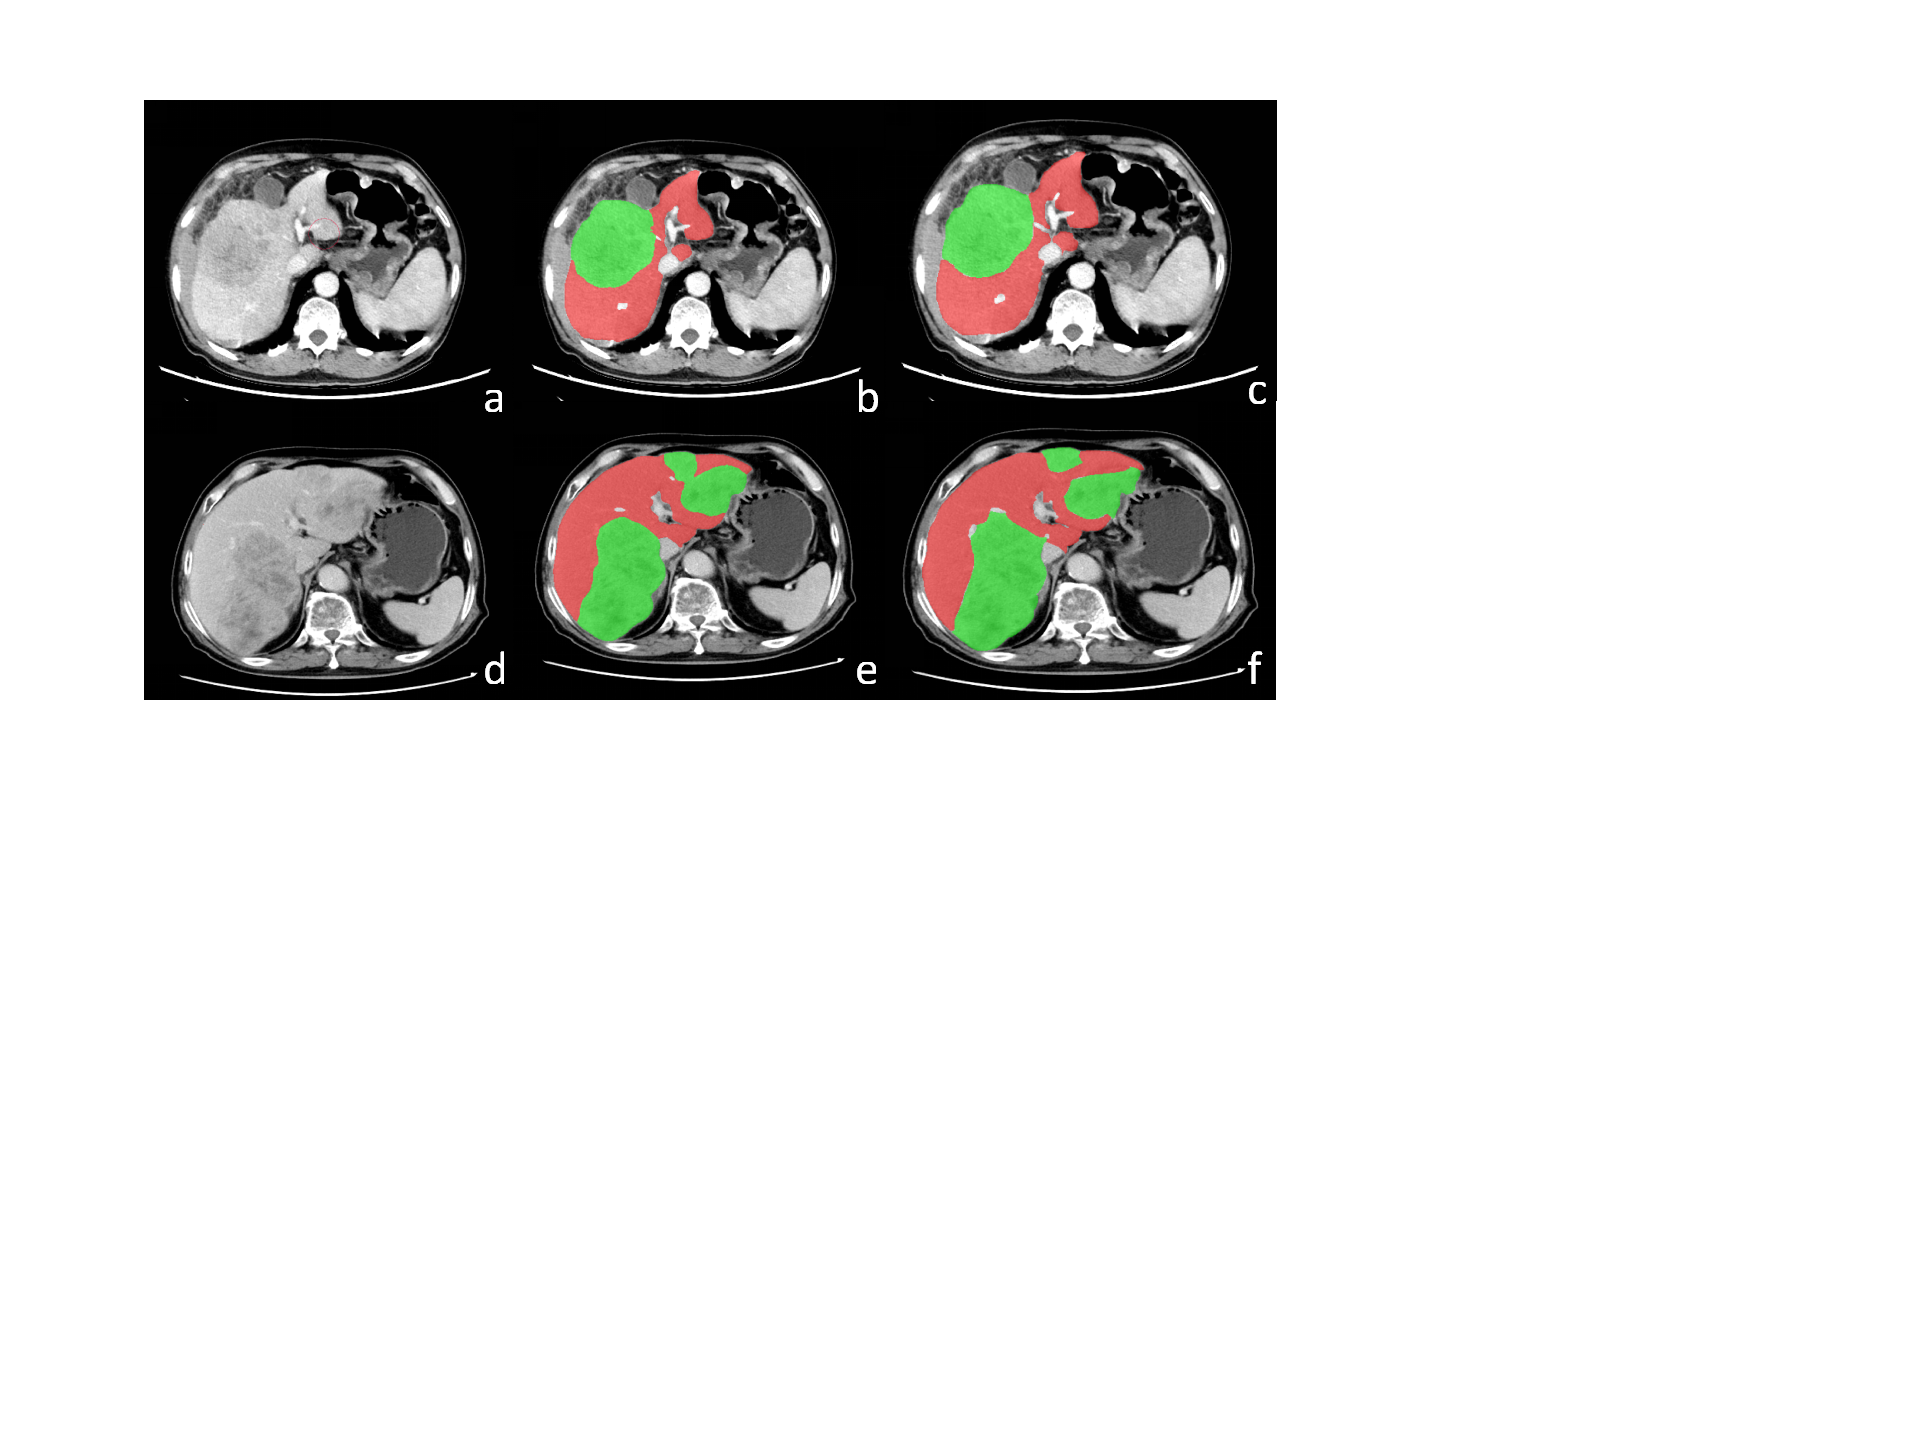


**Supplementary Figure 1.** Examples of automatic segmentation. **a-c** is a 77-year-old male with NPTLF and a Dice value of 0.944 and 0.796 for non-tumoral liver parenchyma and tumor,respectively; **d-f** is a 46-year-old male with PTLF and a Dice value of 0.955 and 0.889 for non-tumoral liver parenchyma and tumor,respectively. **a** and **d** are the original CT images; **b** and **e** are the manual outlining results from radiologists; **c** and **f** are the automatic segmentation results based on the nnU-Net deep learning model.

**
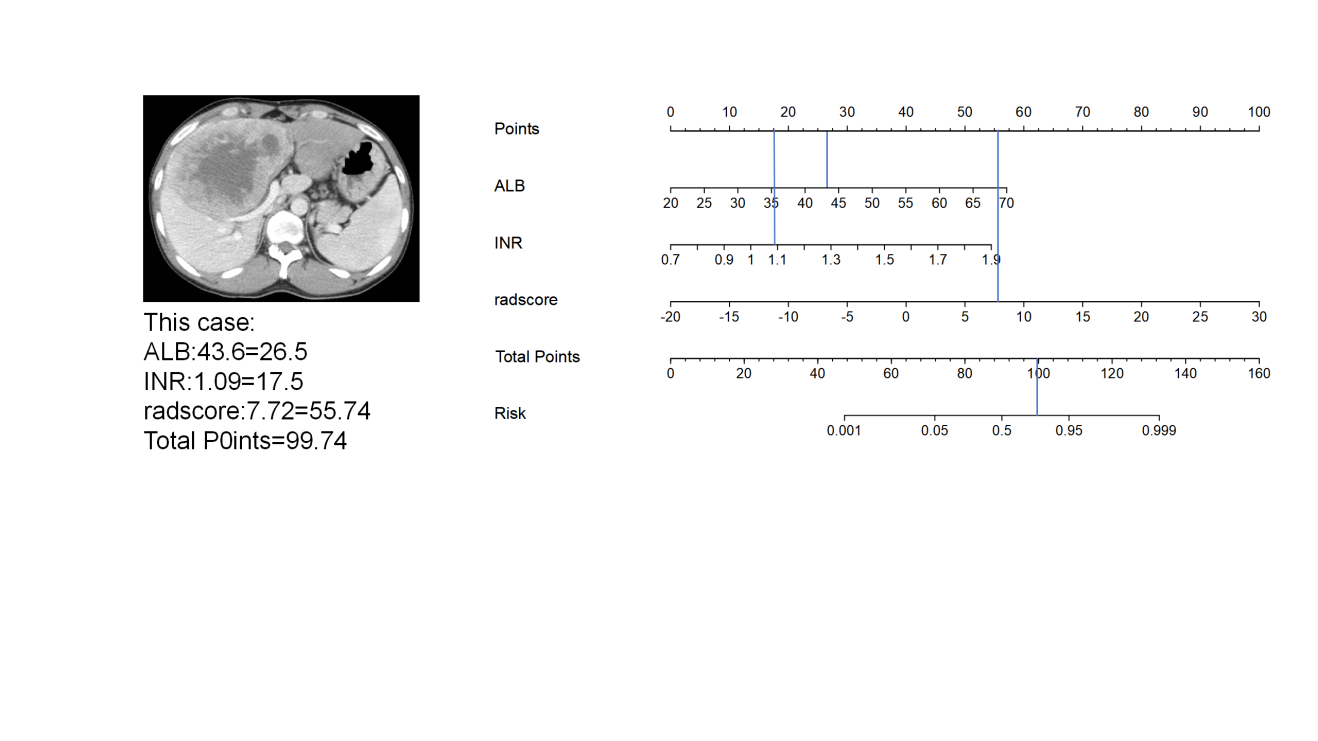
**

**Supplementary Figure 2.** Example of using nomogram for the risk prediction of PTLF.

**Supplementary Table 1: Demographic characteristics of the segmentation cohort**

| Characteristics | Training and validation sets(n=80) | Testing set(n=20) | *P* |
| --- | --- | --- | --- |
| Sex(Male/Female) | 71/9 | 18/2 | 0.873 |
| PTLF/NPTLF | 36/44 | 12/8 | 0.687 |
| Age(year) | 61(52, 71) | 58(53, 58) | 0.565 |
| Tumor location(n%) |  |  | 0.772 |
| Right lobe | 55(68.75) | 15(75) |  |
| Left lobe | 15(18.75) | 4(20) |  |
| Right and Left lobe | 10(12.5) | 1(5） |  |
| Number of tumors(n%) |  |  | 0.222 |
| 1 | 51(63.7) | 9(45) |  |
| ≥2 | 29(36.3) | 11(55) |  |
| Liver cirrhosis(n%) | 49(61.3) | 11(55) | 0.610 |
| hydroperitoneum(n%) | 20(25) | 8(40) | 0.181 |
| CTP(n%) |  |  | 0.161 |
| Class A | 70(87.5) | 10(12.5) |  |
| Class B | 15(75) | 5(25) |  |

PTLF, post-TACE liver failure; NPTLF, non-post-TACE liver failure; CTP, Child-Turcotte-Pugh.

**Supplementary Table 2: Clinical and demographic characteristics of all patients in both the training and the validation cohorts**

| Characteristics | Training cohort(n= 147) | Validation cohort(n= 63) | *P* |
| --- | --- | --- | --- |
| Sex(Male/Female) | 128/19 | 51/12 | 0.252 |
| Age(year) | 61.00(52, 70) | 59.00(52.00, 68.00) | 0.453 |
| Tumor location(n%) |  |  | 0.555 |
| Right lobe | 124(84.4) | 54(85.7) |  |
| Left lobe | 15(10.2) | 4(6.3) |  |
| Right and Left lobe | 8(5.4) | 5(8.0） |  |
| Number of tumors(n%) |  |  | 0.534 |
| 1 | 85(57.8) | 34(54.0) |  |
| ≥2 | 62(42.2) | 29(46.0) |  |
| Tumor diameter(cm) | 9.57(5.94, 12.39) | 11.00(7.09, 15.64) | 0.386 |
| Liver cirrhosis(n%) | 88(59.9) | 41(65.1) | 0.477 |
| hydroperitoneum(n%) | 35(23.8) | 22(34.9) | 0.097 |
| WBC(×109) | 5.37(3.66, 6.82) | 5.01(3.88, 6.78) | 0.994 |
| Neutrophil (n%) | 66.00(60.00, 74.00) | 65.90(57.60, 73.40) | 0.815 |
| RBC(×1012) | 4.12(3.68, 4.56) | 4.12(3.70, 4.54) | 0.944 |
| Hb(g/l) | 126.10 ± 23.38 | 121.84 ± 24.78 | 0.248 |
| ALB(g/L) | 37.89 ± 5.80 | 37.40 ± 4.33 | 0.551 |
| PLT(×1012) | 147.00(95.00, 208.00) | 158.00(94.00, 219.00) | 0.566 |
| PT(s) | 12.70(11.80, 14.00) | 13.20(12.10, 14.20) | 0.204 |
| TT(s) | 18.30(16.90, 19.30) | 17.90(16.80, 19.50) | 0.607 |
| INR | 1.03(0.95, 1.16) | 1.07(1.00, 1.19) | 0.208 |
| APTT(s) | 29.90(27.00, 35.90) | 29.50(27.60, 32.50) | 0.815 |
| AST(IU/L) | 54.00(33.00, 81.00) | 49.20(29.00, 68.00) | 0.275 |
| ALT(IU/L) | 40.00(23.00, 69.00) | 34.40(22.00, 55.00) | 0.271 |
| TB(umol/L) | 19.00(14.49, 24.00) | 19.00(15.50, 27.80) | 0.303 |
| GLU(mmol/L) | 5.06(4.48, 5.66) | 4.97(4.54, 5.57) | 0.698 |
| GGT(IU/L) | 120.30(69.00, 255.00) | 109.00(56.00, 223.00) | 0.374 |
| AFP(ng/ml) | 221.50(16.28, 1761.00) | 137.55(5.60, 3643.25) | 0.485 |
| Embolus(n%) | 56(38.1) | 27(42.9) | 0.518 |
| CTP(n%) |  |  | 0.968 |
| Class A | 121(82.3) | 52(82.5) |  |
| Class B | 26(17.7) | 11(17.5) |  |

WBC, white blood cell; RBC, red blood cell; Hb, hemoglobin; ALB, albumin; PLT, platelet count; PT, prothrombin time; TT, thrombintime; INR, international standardized ratio; APTT, activated partial thromboplastin time; AST, glutamate transaminase; ALT, alanine aminotransferase; TB, total bilirubin; GLU, glucose; GGT, Gamma-GlutamylTransferase;AFP, alpha-fetoprotein; CTP, Child-Turcotte-Pugh
